# Supplementary material for: Case Report: Nonverbal approaches in the treatment of a patient with fibromyalgia with anger rooted in adverse childhood experiences
Source: PubMed Central journal article supplement (PMC11137261; doi:10.3389/fpain.2024.1374324), 2024-05-16

**Table S1**

**History of Present Illness**

| <b>Year</b> | <b>History of Present Illness</b>                                                                                                                   |
|-------------|-----------------------------------------------------------------------------------------------------------------------------------------------------|
| <b>X-8</b>  | <b>Appearance of pain in both knees</b>                                                                                                             |
| <b>X-6</b>  | <b>Synovectomy at Hospital A</b>                                                                                                                    |
| <b>X-5</b>  | <b>Rotational osteotomy at Hospital B</b>                                                                                                           |
| <b>X-4</b>  | <b>The doctor in charge at Hospital B confessed that there was a medical error.</b>                                                                 |
| <b>X-2</b>  | <b>Rotational osteotomy at Hospital C; however, pain in both lower limbs, shoulders, neck, both elbows, the clavicle, and lower back persisted.</b> |
| <b>X-1</b>  | <b>Visited a physician at Hospital C: suspected of having fibromyalgia.</b>                                                                         |
| <b>X</b>    | <b>Referral visit to the department of psychosomatic medicine in our hospital (D).</b>                                                              |

X: year of first referral visit to our hospital.

(X-8: 8 years pre-referral to our team.)

Hospital A: A local hospital

Hospital B: A private Japanese university hospital

Hospital C: A private Japanese university hospital far from her residence

Hospital D: A Japanese national university hospital

**Table S2**

**History of Adverse Experiences**

| <b>History of Adverse Childhood Experiences</b>                                                                                                                                                                                                               |
|---------------------------------------------------------------------------------------------------------------------------------------------------------------------------------------------------------------------------------------------------------------|
| <b>Childhood years~</b><br><b>Akiko changed schools many times.</b><br><b>Neglect by her father</b><br><b>Psychological abuse by her mother</b><br>(Her father was rarely at home. Her mother was nervous, always crying, and overly controlling of her life) |
| <b>5 YO~ Birth of a younger brother</b><br>(Her mother was strict with her and lenient with her younger brother)                                                                                                                                              |
| <b>12YO Onset of the mother's brain disease</b><br><b>Sexual abuse by her uncle</b>                                                                                                                                                                           |
| <b>13YO Refrained from sports due to acetabular dysplasia</b>                                                                                                                                                                                                 |
| <b>History of Adverse Adult Experiences</b>                                                                                                                                                                                                                   |
| <b>20YO~Parents separated</b><br><b>Began teaching career</b>                                                                                                                                                                                                 |
| <b>30s~Psychological harassment by an orthopaedic doctor and her sister-in-law</b>                                                                                                                                                                            |



# Figure S1 Drawings

a.#1 (Fully blacked out drawing)

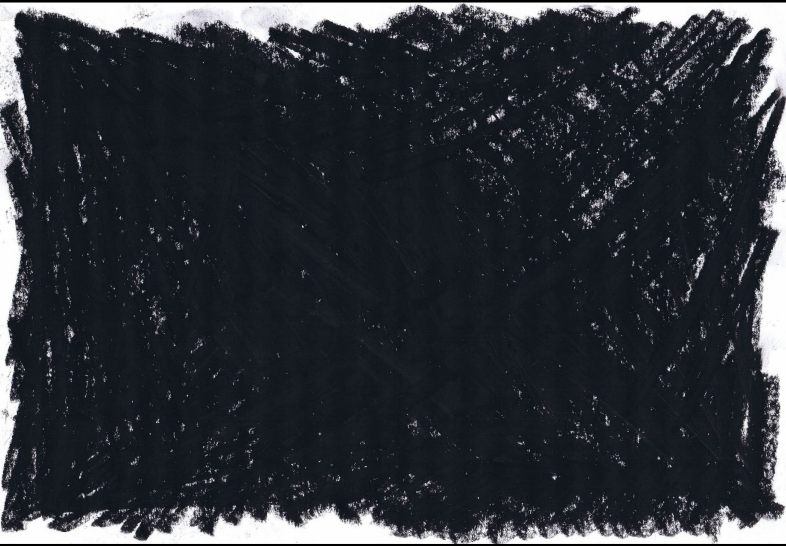

b.#4 Tree

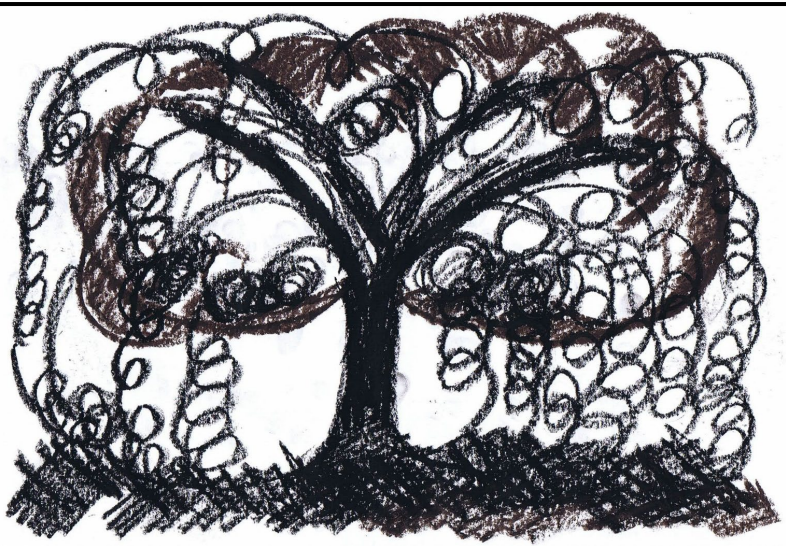

c.#14 Surrounding eyes (off the paper)

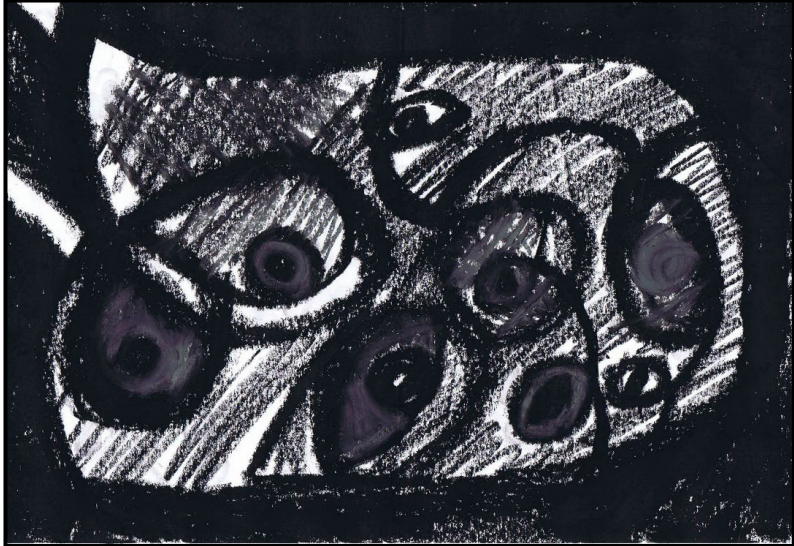

d.#16 People blame me (off the paper)

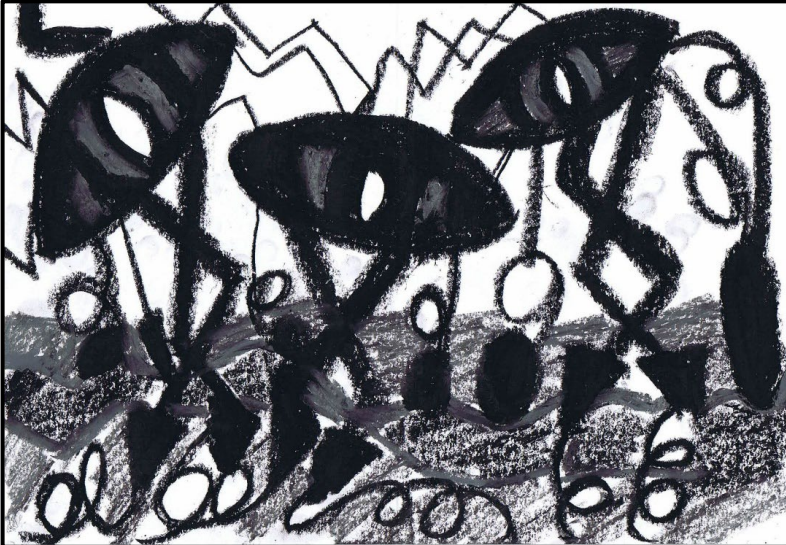

e.#28 Colorful feeling (within a frame)

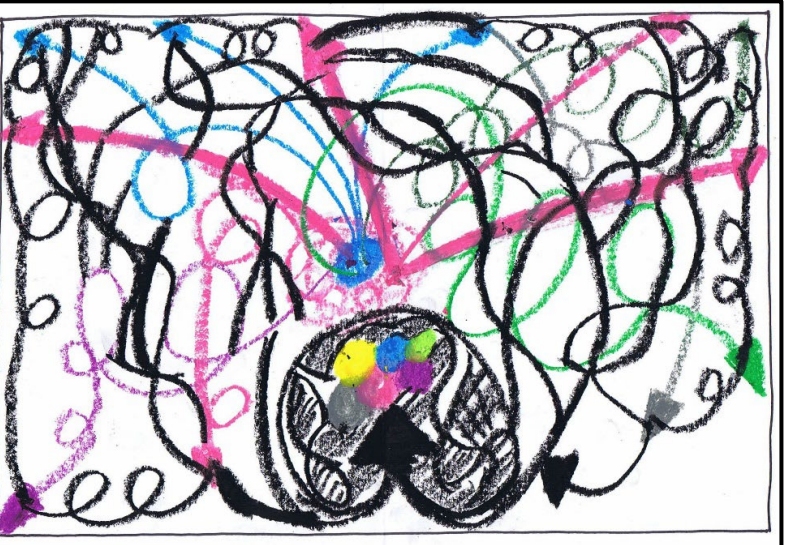

f.#31 Colored Tree (within a frame)

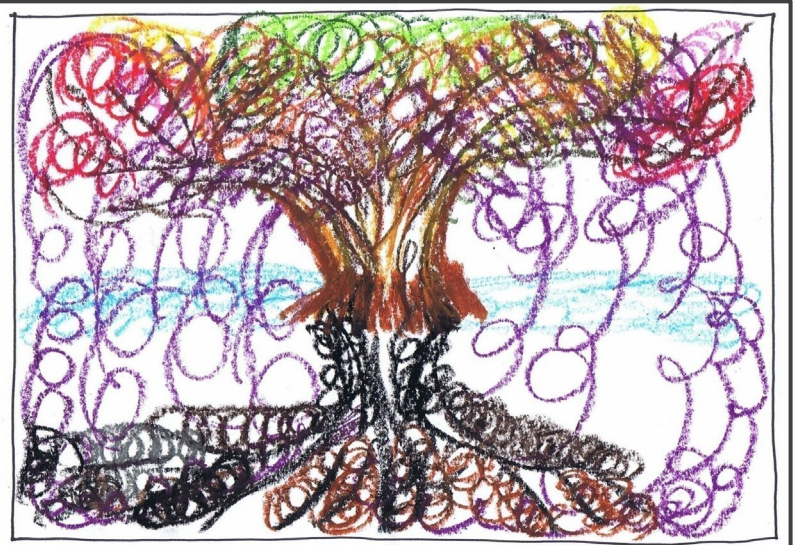



Figure S2. Progression of Treatment

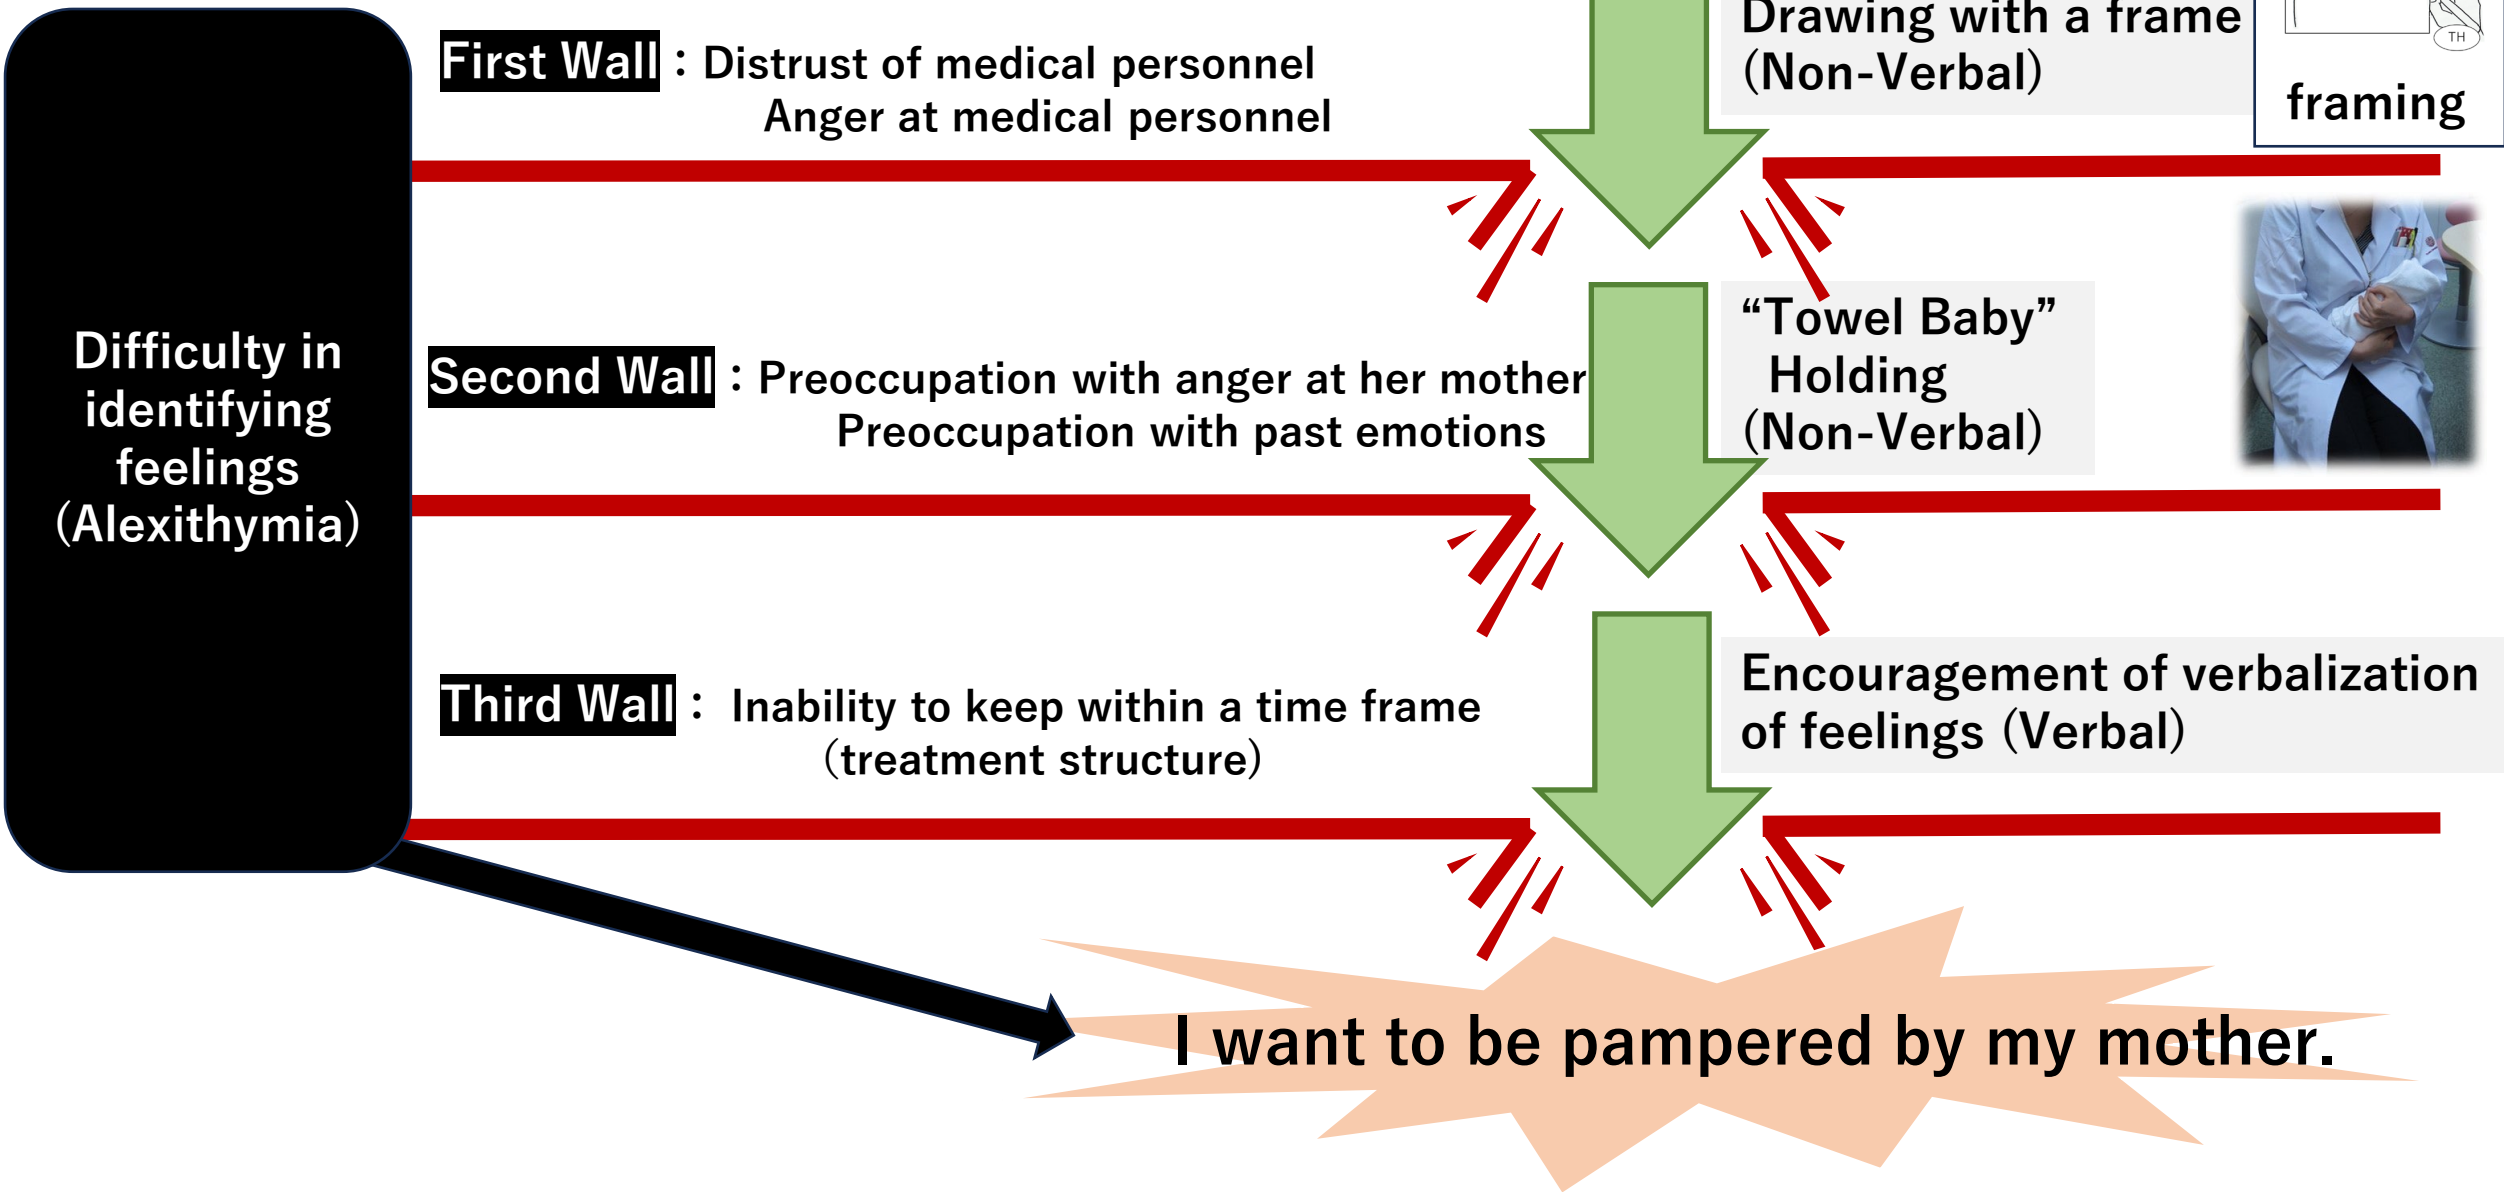

**Figure S3. Depression and anxiety percentile and pain scores over time**

● CES-D 
 ● STAI(STATE) 
 ● STAI(TRAIT) 
 ■ PRI-S 
 ◆ PRI-A 
 ● VAS

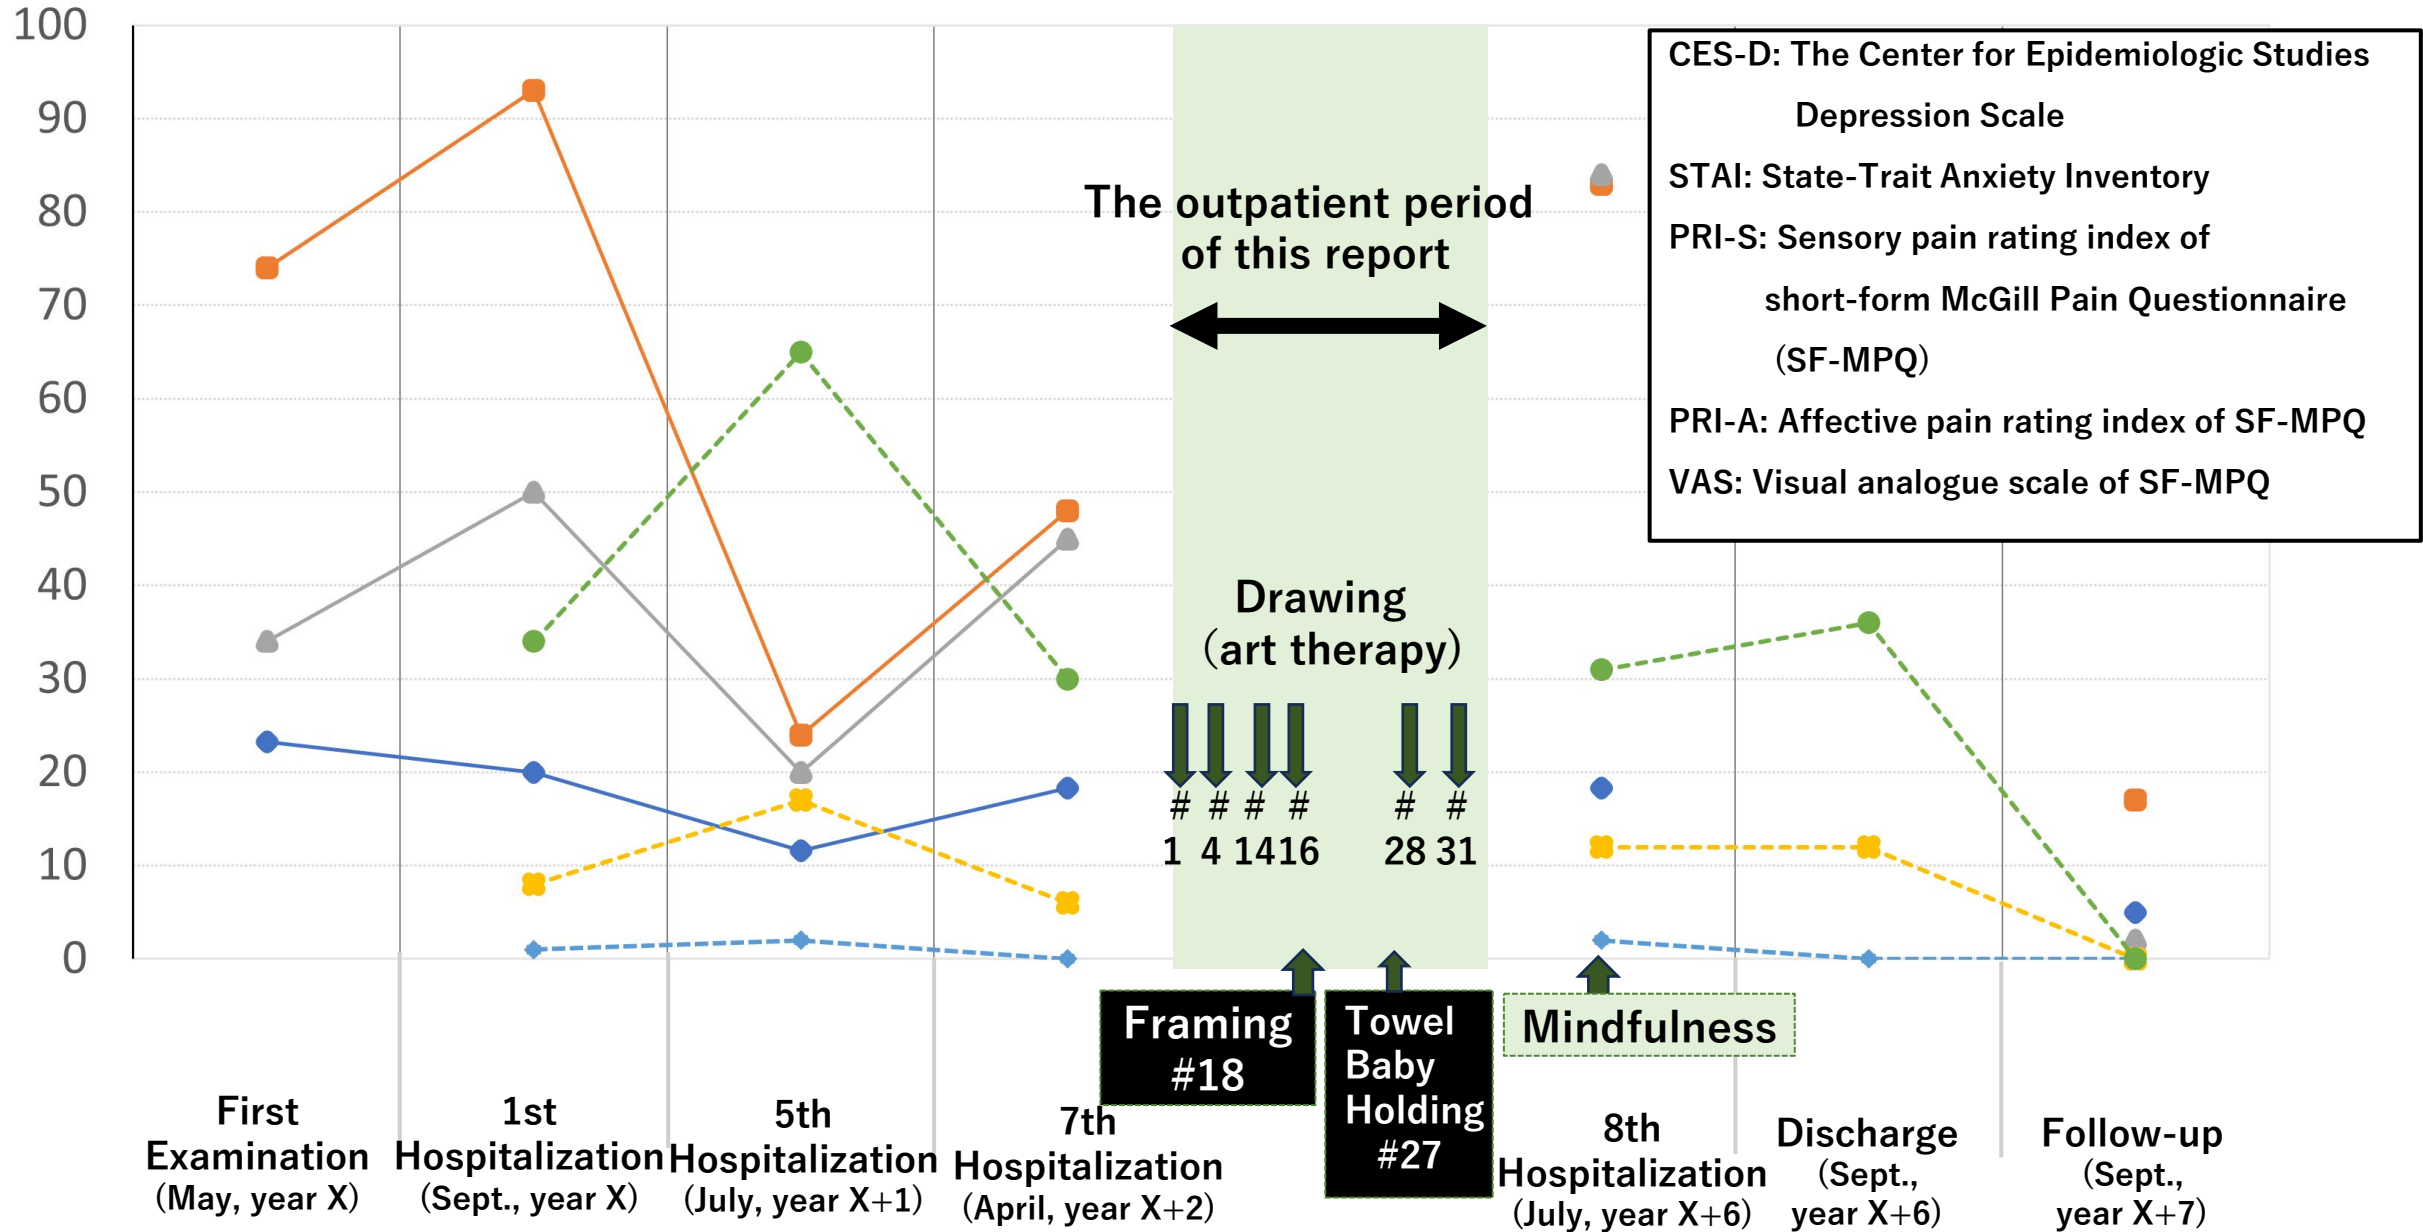

Supplement: Datasheet1.pdf [file Datasheet1.pdf]
